# Supplementary material for: Dietary Iodine Intake and Related Factors among Secondary School Students in Macao
Source: MDPI journal article supplement (doi:10.3390/healthcare11101472), 2023-05-18
Supplement: s1 [file s1]

**Table S1.** Iodine intake of subjects from various food items.

| <b>Food item</b>              | <b>Mean <math>\pm</math> SD (<math>\mu\text{g}</math>)</b> | <b>Median (<math>\mu\text{g}</math>)</b> |
|-------------------------------|------------------------------------------------------------|------------------------------------------|
| <b>Cereals and grains</b>     | <b>2.1 <math>\pm</math> 1.4</b>                            | <b>1.8</b>                               |
| Rice                          | 0.9 $\pm$ 0.6                                              | 0.9                                      |
| Congee                        | 0 $\pm$ 0                                                  | 0.1                                      |
| Noodles                       | 0.3 $\pm$ 0.3                                              | 0.2                                      |
| Steamed bread                 | 0.1 $\pm$ 0.5                                              | 0                                        |
| Bread                         | 0.7 $\pm$ 0.8                                              | 0.6                                      |
| Biscuit                       | 0 $\pm$ 0                                                  | 0                                        |
| <b>Starchy rhizomes</b>       | <b>0.2 <math>\pm</math> 0.4</b>                            | <b>0.2</b>                               |
| Potato                        | 0.2 $\pm$ 0.4                                              | 0.2                                      |
| <b>Soybeans products</b>      | <b>2.8 <math>\pm</math> 5.2</b>                            | <b>1.3</b>                               |
| Tofu                          | 2.1 $\pm$ 4.5                                              | 1.1                                      |
| Dried bean curd               | 0.2 $\pm$ 0.6                                              | 0                                        |
| Soy milk                      | 0.5 $\pm$ 1.0                                              | 0.2                                      |
| <b>Vegetables and legumes</b> | <b>4.8 <math>\pm</math> 4.0</b>                            | <b>4</b>                                 |
| Dark-green leafy vegetables   | 2.3 $\pm$ 1.9                                              | 2.5                                      |
| Light-green leafy vegetables  | 0 $\pm$ 0                                                  | 0                                        |
| Gourd                         | 0.3 $\pm$ 0.5                                              | 0.1                                      |
| Legume                        | 0.4 $\pm$ 0.8                                              | 0.1                                      |
| Carrot                        | 1.7 $\pm$ 2.3                                              | 0.2                                      |
| Tomato                        | 0.2 $\pm$ 0.4                                              | 0.1                                      |
| <b>Seaweed and mushrooms</b>  | <b>15.7 <math>\pm</math> 41.5</b>                          | <b>5.8</b>                               |
| Mushroom                      | 2.7 $\pm$ 4.2                                              | 1.4                                      |
| Kelp                          | 6.1 $\pm$ 23.7                                             | 0                                        |
| Dried seaweed                 | 6.9 $\pm$ 20.4                                             | 1.2                                      |
| <b>Fruits</b>                 | <b>1.5 <math>\pm</math> 2.1</b>                            | <b>0.8</b>                               |
| Orange                        | 0.6 $\pm$ 0.9                                              | 0.3                                      |
| Apple                         | 0 $\pm$ 0                                                  | 0                                        |
| Banana                        | 0.8 $\pm$ 1.5                                              | 0.3                                      |
| Kiwi                          | 0 $\pm$ 0                                                  | 0                                        |
| Watermelon                    | 0 $\pm$ 0                                                  | 0                                        |
| Mango                         | 0 $\pm$ 0                                                  | 0                                        |
| Grape                         | 0 $\pm$ 0                                                  | 0                                        |
| Strawberry                    | 0 $\pm$ 0                                                  | 0                                        |
| Blueberry                     | 0 $\pm$ 0                                                  | 0                                        |
| <b>Nuts and seeds</b>         | <b>0.3 <math>\pm</math> 0.9</b>                            | <b>0</b>                                 |
| Almond                        | 0.1 $\pm$ 0.4                                              | 0                                        |
| Pistachio                     | 0.1 $\pm$ 0.4                                              | 0                                        |
| Peanut                        | 0.1 $\pm$ 0.3                                              | 0                                        |

Table S1. Continued.

| Food item                            | Mean $\pm$ SD ( $\mu\text{g}$ )   | Median ( $\mu\text{g}$ ) |
|--------------------------------------|-----------------------------------|--------------------------|
| <b>Poultry</b>                       | <b>0.4 <math>\pm</math> 1.0</b>   | <b>0.2</b>               |
| Pork                                 | 0.2 $\pm$ 0.2                     | 0.1                      |
| Beef                                 | 0 $\pm$ 0.1                       | 0                        |
| Lamb                                 | 0.1 $\pm$ 2.2                     | 0                        |
| Sausage and ham                      | 0.1 $\pm$ 3.2                     | 0.9                      |
| <b>Livestock</b>                     | <b>3.0 <math>\pm</math> 4.6</b>   | <b>1.4</b>               |
| Chicken                              | 2.6 $\pm$ 0.1                     | 0.1                      |
| Duck                                 | 0.3 $\pm$ 0.9                     | 0                        |
| <b>Milk and dairy products</b>       | <b>16.0 <math>\pm</math> 18.1</b> | <b>10.4</b>              |
| Milk                                 | 10.8 $\pm$ 13.3                   | 6.5                      |
| Cheese                               | 0.9 $\pm$ 1.6                     | 0.4                      |
| Yogurt                               | 4.3 $\pm$ 9.0                     | 0                        |
| <b>Eggs</b>                          | <b>12.3 <math>\pm</math> 13.1</b> | <b>7.6</b>               |
| Egg                                  | 11.6 $\pm$ 12.1                   | 7.5                      |
| Preserved egg                        | 0.7 $\pm$ 3.2                     | 0                        |
| <b>Seafood</b>                       | <b>14.1 <math>\pm</math> 24.5</b> | <b>8.3</b>               |
| Sea-water fish                       | 3.9 $\pm$ 9.5                     | 0.6                      |
| Fresh-water fish                     | 0.3 $\pm$ 0.6                     | 0.1                      |
| Sashimi                              | 0.9 $\pm$ 1.9                     | 0.3                      |
| Fish ball                            | 2.2 $\pm$ 5.0                     | 1.1                      |
| Shrimp                               | 1.0 $\pm$ 2.1                     | 0.3                      |
| Crab                                 | 2.9 $\pm$ 7.5                     | 0                        |
| Shellfish                            | 2.6 $\pm$ 13.0                    | 0.8                      |
| Squid                                | 0.4 $\pm$ 1.2                     | 0                        |
| <b>Other common foods and drinks</b> | <b>22.9 <math>\pm</math> 52.1</b> | <b>8.9</b>               |
| Egg waffle                           | 1.1 $\pm$ 3.0                     | 0.5                      |
| Cake                                 | 1.5 $\pm$ 2.2                     | 0.8                      |
| French fries                         | 0.7 $\pm$ 1.7                     | 0.3                      |
| Chips                                | 0.2 $\pm$ 0.5                     | 0                        |
| Seaweed snack                        | 4.9 $\pm$ 19.5                    | 0                        |
| Kelp soup                            | 10.1 $\pm$ 44.0                   | 0                        |
| Black sesame soup                    | 0 $\pm$ 0                         | 0                        |
| Soda drink                           | 0.9 $\pm$ 1.7                     | 0.4                      |
| Carton-pack beverage                 | 0 $\pm$ 0                         | 0                        |
| Bubble milk tea                      | 2.6 $\pm$ 4.1                     | 1.1                      |
| Juice                                | 0.9 $\pm$ 2.2                     | 0                        |
